# Supplementary material for: The effect of high glucose on lipid metabolism in the human placenta
Source: PubMed Central journal article supplement (PMC6773712; doi:10.1038/s41598-019-50626-x), 2019-10-01
Supplement: 41598_2019_50626_MOESM1_ESM.pdf [file 41598_2019_50626_MOESM1_ESM.pdf]

## **The effect of high glucose on lipid metabolism in the human placenta**

Charlotte H. Hulme<sup>1,2</sup>, Anna Nicolaou<sup>3,4</sup>, Sharon A Murphy<sup>4</sup>, Alexander E. P. Heazell<sup>1,2</sup>, Jenny E. Myers<sup>1,2</sup>, & \*Melissa Westwood<sup>1,2</sup>

<sup>1</sup>School of Medical Sciences, Faculty of Biology, Medicine and Health, The University of Manchester, Manchester Academic Health Sciences Centre, Manchester M13 9PT, UK;

<sup>2</sup>Maternal and Fetal Health Research Centre, St Mary's Hospital, Central Manchester University Hospitals NHS Foundation Trust, Manchester Academic Health Sciences Centre, Manchester, Manchester M13 9WL, UK;

<sup>3</sup>Lydia Becker Institute of Immunology and Inflammation, The University of Manchester, Manchester Academic Health Science Centre, Manchester M13 9PT, UK.

<sup>4</sup>School of Health Sciences, Faculty of Biology, Medicine and Health, The University of Manchester, Manchester Academic Health Science Centre, Manchester M13 9PT, UK.

| Fatty acid (shorthand notation)  | % Weight of Total Fatty Acid |                 | 25 mM Vs 5 mM D-glucose (p-value) |
|----------------------------------|------------------------------|-----------------|-----------------------------------|
|                                  | 5 mM D-glucose               | 25 mM D-glucose |                                   |
| Myristic acid (C14:0)            | 0.60 ± 0.19                  | 0.51 ± 0.11     | 1.00                              |
| Pentadecanoic acid (C15:0)       | 0.41 ± 0.41                  | 0.49 ± 0.75     | 0.94                              |
| Pentadecenoic acid (C15:1)       | 0.71 ± 0.43                  | 0.40 ± 0.29     | 0.31                              |
| Palmitic acid (C16:0)            | 25.86 ± 0.87                 | 26.85 ± 0.62    | 0.67                              |
| Palmitoleic acid (C16:1)         | 0.57 ± 0.33                  | 0.38 ± 0.09     | 0.39                              |
| Heptadecanoic acid (C17:0)       | 0.41 ± 0.05                  | 0.47 ± 0.09     | 0.39                              |
| Heptadecenoic acid (C17:1)       | 0.40 ± 0.07                  | 0.34 ± 0.11     | 0.82                              |
| Stearic acid (C18:0)             | 16.08 ± 2.02                 | 17.54 ± 1.57    | 0.49                              |
| Elaidic acid (C18:1n-9t)         | 0.01 ± 0.07                  | 0.00 ± 0.11     | 0.93                              |
| Oleic acid (C18:1n-9c)           | 10.05 ± 2.61                 | 9.54 ± 1.53     | 0.82                              |
| Vaccenic Acid (C18:1n-7)         | 1.44 ± 0.40                  | 1.82 ± 0.86     | 0.77                              |
| Linolelaidic acid (C18:2n-6t)    | 0.06 ± 0.04                  | 0.05 ± 0.04     | 0.69                              |
| Linoleic acid (C18:2n-6c)        | 7.41 ± 1.07                  | 7.52 ± 1.77     | 0.70                              |
| γ-linoleic acid (C18:3n-6)       | 0.23 ± 0.08                  | 0.32 ± 0.30     | 1.00                              |
| Linolenic acid (C18:3n-3)        | 0.13 ± 0.15                  | 0.08 ± 0.09     | 0.94                              |
| Arachidic acid (C20:0)           | 0.27 ± 0.13                  | 0.30 ± 0.10     | 0.59                              |
| Eicosenoic acid (C20:1n-9)       | 0.30 ± 0.34                  | 0.75 ± 1.11     | 0.48                              |
| Eicosadienoic acid (C20:2)       | 0.40 ± 0.07                  | 0.34 ± 0.16     | 0.94                              |
| Eicosatrienoic acid (C20:3n-6)   | 4.34 ± 1.21                  | 3.42 ± 1.83     | 0.48                              |
| Arachidonic acid (C20: 4n-6)     | 18.72 ± 1.51                 | 14.81 ± 6.78    | 0.94                              |
| Eicosatrienoic acid (C20: 3n-3)  | 1.12 ± 0.57                  | 1.71 ± 2.49     | 0.63                              |
| Behenic acid (C22:0)             | 0.31 ± 0.46                  | 0.49 ± 0.40     | 0.70                              |
| Erucic acid (C22:1n-9)           | 0.19 ± 0.05                  | 0.22 ± 0.14     | 1.00                              |
| Eicosapentaenoic acid (C20:5n-3) | 0.08 ± 0.04                  | 0.09 ± 0.10     | 0.26                              |
| Tricosanoic acid (C23:0)         | 0.29 ± 0.07                  | 0.20 ± 0.12     | 0.18                              |
| Docosadienoic acid (C22:2)       | 0.06 ± 0.02                  | 0.03 ± 0.04     | 0.23                              |
| Docosatetraenoic acid (C22:4n-6) | 1.49 ± 0.49                  | 1.41 ± 0.73     | 1.00                              |
| Lignoceric acid (C24:0)          | 2.01 ± 1.07                  | 1.75 ± 1.38     | 0.94                              |
| Nervonic acid (C24:1)            | 1.14 ± 0.15                  | 1.00 ± 0.14     | 0.94                              |
| Docosapentaenoic acid (C22:5n-3) | 0.93 ± 0.14                  | 0.84 ± 0.13     | 1.00                              |
| Docosahexaenoic acid (C22:6n-3)  | 4.39 ± 0.56                  | 4.06 ± 0.61     | 0.82                              |

**Supplementary Table One.** Profile of fatty acids present in explants of placenta from uncomplicated pregnancies (n=6). The mean (SD) amount of each fatty acid as percentage weight of total fatty acids in placental explants cultured in 5 mM or 25 mM D-glucose for 24 h is shown. Data were analysed using the Wilcoxon-matched pairs test; no statistically significant differences were detected.

| Fatty acid (shorthand notation)  | % Weight of Total Fatty Acid |                   |              |                   | Kruskal-Wallis (p-value) |
|----------------------------------|------------------------------|-------------------|--------------|-------------------|--------------------------|
|                                  | T1 DM                        | Control (BMI ≤30) | T2 DM        | Control (BMI ≥30) |                          |
| Myristic acid (C14:0)            | 0.39 ± 0.22                  | 0.50 ± 0.26       | 0.44 ± 0.10  | 0.43 ± 0.06       | 0.70                     |
| Pentadecanoic acid (C15:0)       | 0.65v±0.70                   | 1.30 ± 1.07       | 0.80 ± 0.87  | 0.51 ± 0.41       | 0.61                     |
| Pentadecenoic acid (C15:1)       | 0.92 ± 1.26                  | 0.92 ± 0.98       | 0.48 ± 0.47  | 0.75 ± 0.79       | 0.93                     |
| Palmitic acid (C16:0)            | 25.51 ± 0.70                 | 25.47 ± 0.52      | 25.39 ± 0.75 | 23.6 ± 4.15       | 0.83                     |
| Palmitoleic acid (C16:1)         | 0.44 ± 0.11                  | 0.57 ± 0.52       | 0.50 ± 0.14  | 0.43 ± 0.19       | 0.72                     |
| Heptadecanoic acid (C17:0)       | 0.29 ± 0.35                  | 0.35 ± 0.05       | 0.31 ± 0.07  | 0.53 ± 0.31       | 0.62                     |
| Heptadecenoic acid (C17:1)       | 0.47 ± 0.10                  | 0.42 ± 0.09       | 0.42 ± 0.08  | 0.43 ± 0.17       | 0.76                     |
| Stearic acid (C18:0)             | 13.18 ± 0.57                 | 14.73 ± 2.31      | 17.50 ± 6.30 | 15.52 ± 1.06      | 0.59                     |
| Elaidic acid (C18:1n-9t)         | 2.08 ± 3.07                  | 1.91 ± 3.07       | 2.83 ± 4.35  | 1.35 ± 2.88       | 0.89                     |
| Oleic acid (C18:1n-9c)           | 6.58 ± 3.68                  | 9.49 ± 7.57       | 7.29 ± 4.57  | 7.57 ± 2.99       | 0.85                     |
| Vaccenic acid(C18:1n-7)          | 0.96 ± 0.67                  | 1.18 ± 0.57       | 1.09 ± 0.84  | 1.12 ± 0.38       | 0.87                     |
| Linolelaidic acid (C18:2n-6t)    | 0.01± 0.02                   | 0.15± 0.30        | 0.04 ± 0.03  | 0.02 ± 0.02       | 0.31                     |
| Linoleic acid (C18:2n-6c)        | 9.54± 1.05                   | 8.31 ± 2.42       | 9.22 ± 1.81  | 8.93 ± 1.16       | 0.58                     |
| γ-linoleic acid (C18:3n-6)       | 0.12 ± 0.05                  | 0.24 ± 0.38       | 0.17 ± 0.18  | 0.06 ± 0.07       | 0.70                     |
| Linolenic acid (C18:3n-3)        | 0.02 ± 0.03                  | 0.06 ± 0.06       | 0.08 ± 0.12  | 0.02 ± 0.02       | 0.65                     |
| Arachidic acid (C20:0)           | 0.27 ± 0.09                  | 0.33 ± 0.03       | 0.32 ± 0.07  | 0.25 ± 0.07       | 0.56                     |
| Eicosenoic acid (C20:1n-9)       | 0.17 ± 0.07                  | 0.18 ± 0.15       | 0.47 ± 0.66  | 0.14 ± 0.03       | 0.32                     |
| Eicosadienoic acid (C20:2)       | 0.37 ± 0.05                  | 0.37 ± 0.07       | 0.38 ± 0.05  | 0.31 ± 0.07       | 0.76                     |
| Eicosatrienoic acid (C20:3n-6)   | 4.11 ± 2.00                  | 5.17 ± 0.94       | 5.01 ± 0.82  | 4.68 ± 1.98       | 0.94                     |
| Arachidonic acid (C20: 4n-6)     | 20.59 ± 2.42                 | 19.20 ± 2.84      | 18.63 ± 5.25 | 18.43 ± 3.92      | 0.70                     |
| Eicosatrienoic acid (C20:3n-3)   | 2.41 ± 2.72                  | 5.17 ± 0.93       | 5.01 ± 0.82  | 4.68 ± 1.98       | 0.82                     |
| Behenic acid (C22:0)             | 0.10 ± 0.06                  | 0.09 ± 0.09       | 0.21 ± 0.28  | 0.18 ± 0.27       | 0.90                     |
| Erucic acid (C22:1n-9)           | 0.16 ± 0.06                  | 0.13 ± 0.09       | 0.19 ± 0.07  | 0.18 ± 0.07       | 0.40                     |
| Eicosapentaenoic acid (C20:5n-3) | 0.25 ± 0.34                  | 0.04 ± 0.05       | 0.10 ± 0.06  | 0.08 ± 0.09       | 0.32                     |
| Tricosanoic acid (C23:0)         | 0.20 ± 0.06                  | 0.24 ± 0.03       | 0.24 ± 0.07  | 0.19 ± 0.12       | 0.65                     |
| Docosadienoic acid (C22:2)       | 0.03 ± 0.02                  | 0.06 ± 0.08       | 0.21 ± 0.44  | 0.03 ± 0.03       | 0.74                     |
| Docosatetraenoic acid (C22:4n-6) | 1.12 ± 0.22                  | 1.19 ± 0.36       | 1.32 ± 0.17  | 1.01 ± 0.59       | 0.39                     |
| Lignoceric acid (C24:0)          | 1.69 ± 0.38                  | 1.08 ± 0.56       | 1.52 ± 0.34  | 1.28 ± 0.10       | 0.58                     |
| Nervonic acid (C24:1)            | 1.14 ± 0.13                  | 0.87 ± 0.11       | 1.02 ± 0.22  | 1.14 ± 0.15       | 0.53                     |
| Docosapentaenoic acid (C22:5n-3) | 0.82 ± 0.23                  | 0.71 ± 0.18       | 0.85 ± 0.15  | 1.25 ± 1.08       | 0.58                     |
| Docosahexaenoic acid (C22:6n-3)  | 4.60 ± 0.88                  | 3.47 ± 0.46       | 3.71 ± 0.71  | 4.21 ± 1.00       | 0.62                     |

**Supplementary Table Two.** Profile of fatty acids present in placentas from women with pregnancies complicated by type 1 diabetes (n=6), type 2 diabetes (n=6) and BMI-matched uncomplicated pregnancies (BMI  $\leq$  30, n=6; BMI  $\geq$  30, n=6). The mean (SD) amount of each fatty acid as percentage weight of total fatty acids is shown. Data were analysed using the Kruskal-Wallis test; no statistically significant differences were detected.

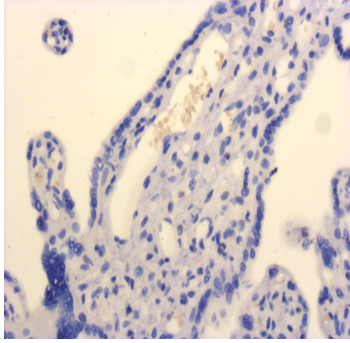

**Mouse non-immune IgG  
(5µg/ml)**

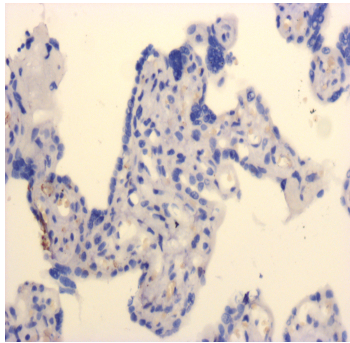

**Rabbit non-immune IgG  
(5µg/ml)**

**Supplementary Figure One.** Immunohistochemical analysis of placental tissue from uncomplicated term pregnancies probed with non-immune IgG from mouse or rabbit in place of protein-specific primary antibody. Images are representative of data obtained from 6 different placentas.
